# Supplementary material
Source: PubMed Central journal article supplement (PMC5100797)
Supplement: supp_pp.16.00696_PP2015-00296DR2_Supplemental_Materialfig1.pdf [file supp_pp.16.00696_PP2015-00296DR2_Supplemental_Materialfig1.pdf]

**Figure S1**

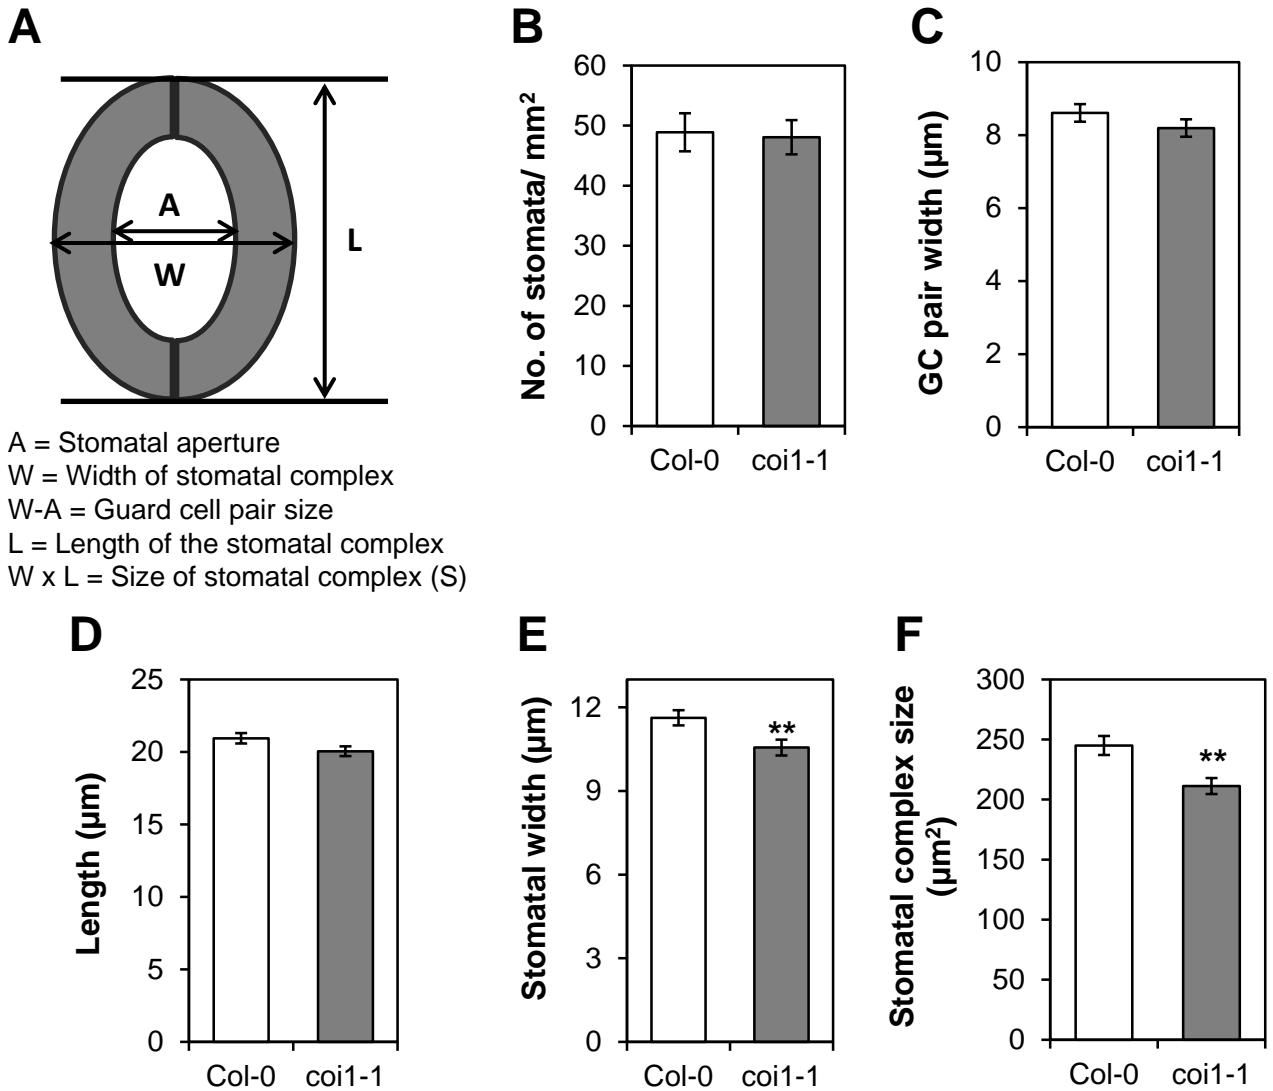

**Figure S1.** Measurements of stomatal complex in Col-0 and *coi1-1* intact, non-treated leaves 3 h after lights were turned on in the morning. **A**, The diagram represents the measurements taken from stoma-forming guard cells. **B**, Stomatal density. **C**, Guard cell pair width measured based on stomatal complex width minus the stomatal pore width. **D**, Stomatal length. **E**, Width of the stomatal complex. **F**, Stomatal complex size calculated by multiplying the complex width by the length. Results are shown as means ( $n \geq 60$ )  $\pm$  SE and the asterisks above the *coi1-1* bars indicate statistical significance in comparison to Col-0 as calculated with two-tailed Student's *t*-test (\*\* =  $p < 0.01$ ). Note that all measurements taken were similar between *coi1-1* and Col-0, except that stomatal aperture was significant smaller in *coi1-1* plants (Fig. 3B) which reflected on narrower stomatal width (**E**) and smaller stomatal complex size (**F**).
