# Supplementary material
Source: PubMed Central journal article supplement (PMC5100797)
Supplement: supp_pp.16.00696_PP2015-00296DR2_Supplemental_Materialfig2.pdf [file supp_pp.16.00696_PP2015-00296DR2_Supplemental_Materialfig2.pdf]

**Figure S2**

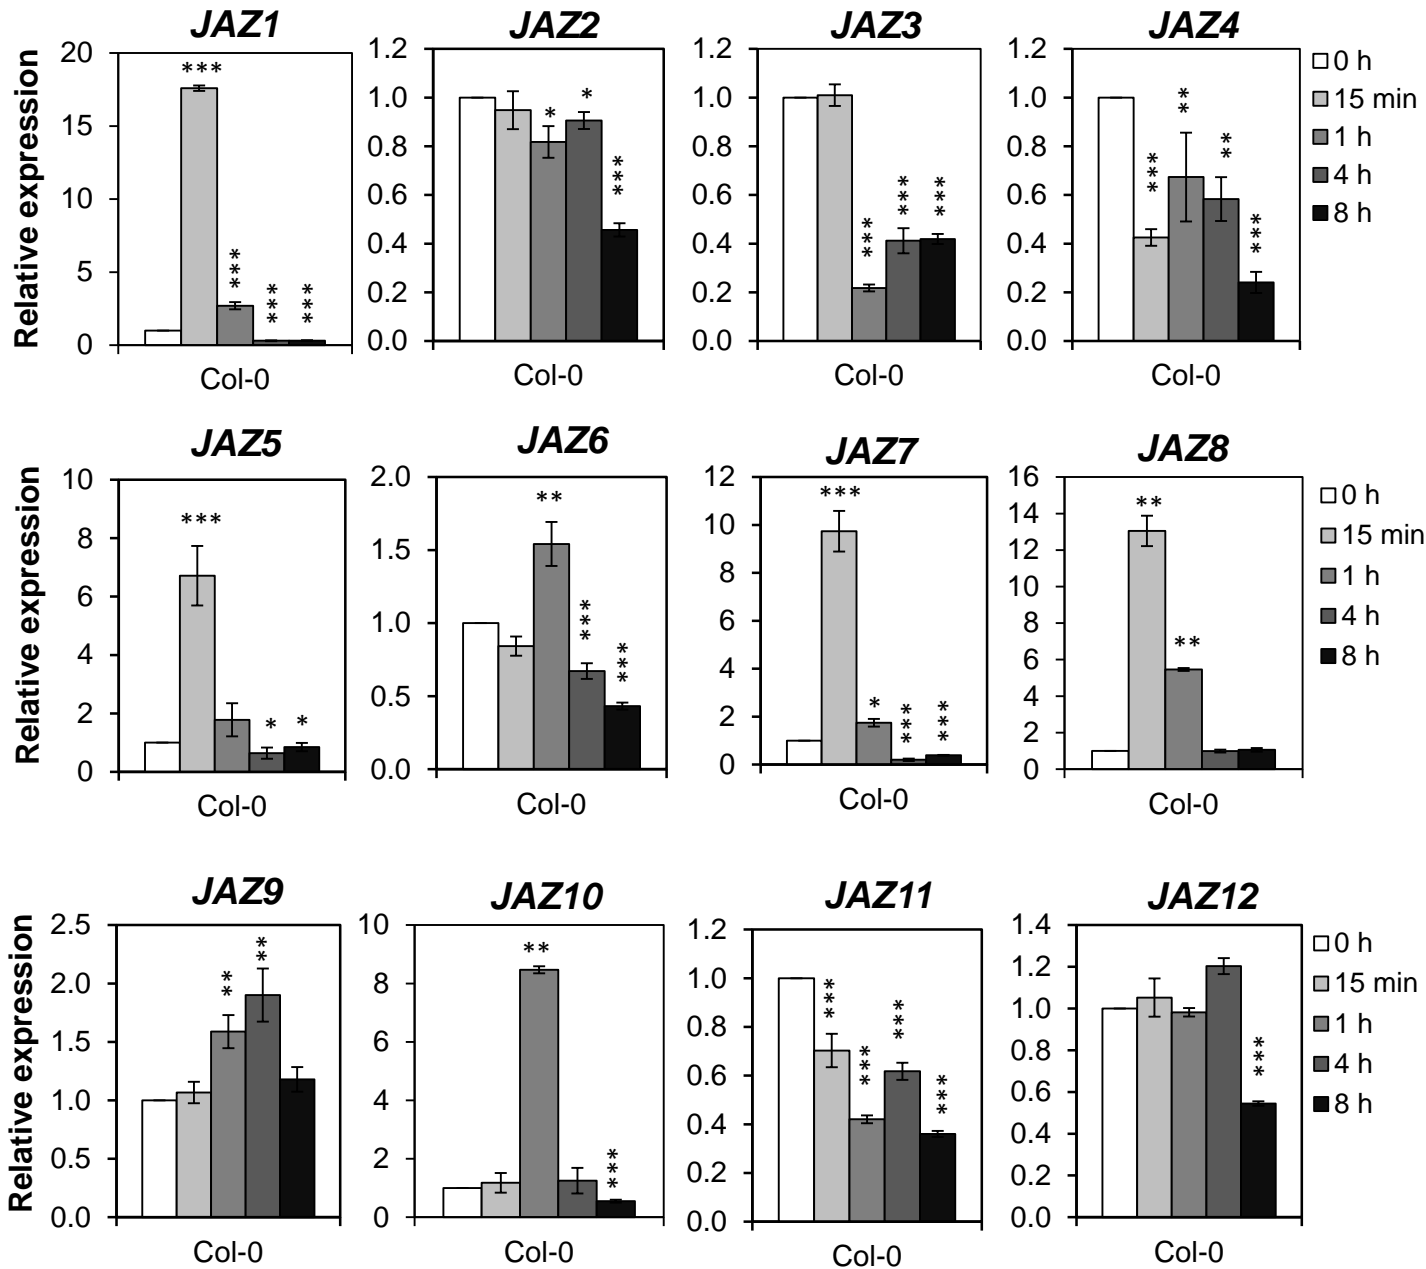

**Figure S2.** *JAZ* genes are regulated by air relative humidity (RH) levels. Data points indicate the relative expression of indicated genes after placing Col-0 plants under >95% RH (grey-shaded bars) as compared to plants kept at 60% RH (white bar time 0 h set as value 1). Results are shown as average (n=3) with standard error (SE) bars. The asterisks above the bars indicate statistical significance in comparison to the 0 h time point as calculated with two-tailed Student's *t*-test (\* =  $p < 0.05$ , \*\* =  $p < 0.01$ , \*\*\* =  $p < 0.001$ ). Significant means above 1 are considered up-regulation and significant means below 1 are considered down-regulation. Note that error bars for some data points are very small and do not appear in the graph. Two biological replicates were performed with similar results.
