# Supplementary material
Source: PubMed Central journal article supplement (PMC5100797)
Supplement: supp_pp.16.00696_PP2015-00296DR2_Supplemental_Materialfig3.pdf [file supp_pp.16.00696_PP2015-00296DR2_Supplemental_Materialfig3.pdf]

**Figure S3**

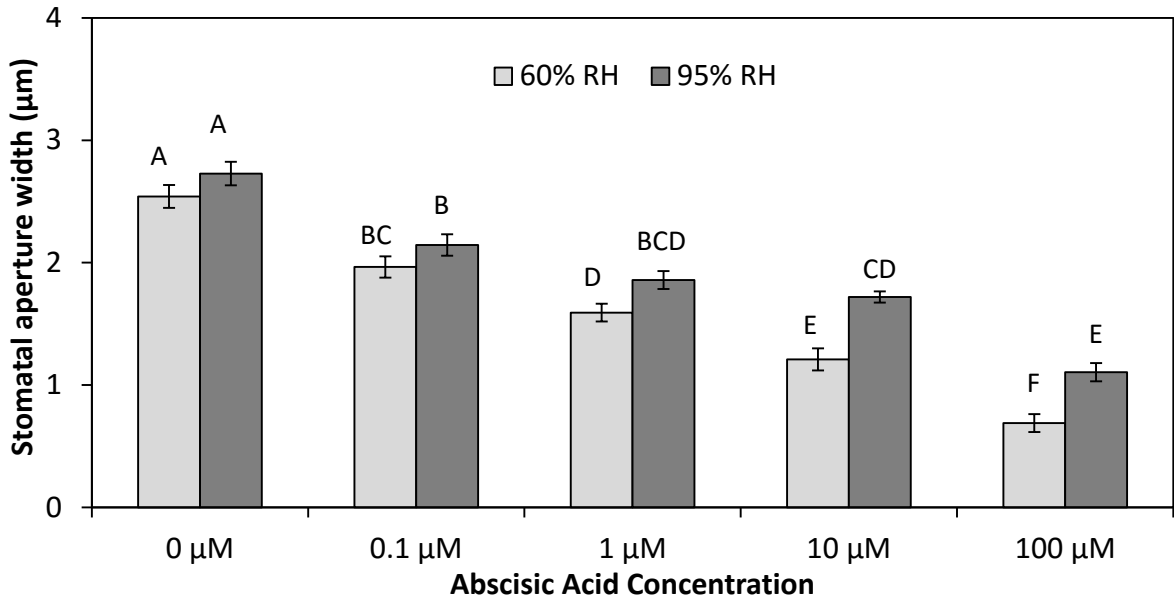

**Figure S3.** Addition of exogenous abscisic acid is not enough to completely close the stomatal pore under high relative humidity (RH). Stomatal aperture width in intact leaves of Col-0 2 h after exposure to the varying concentrations of abscisic acid. Data points are average ( $n > 60$ )  $\pm$  SE and different letters above the bars indicate statistical significance ( $p < 0.05$ ) calculated with ANOVA.
